# Supplementary material
Source: PubMed Central journal article supplement (PMC3119589)
Supplement: 835946.f1.pdf [file 835946.f1.pdf]

Supplementary Table 1: Principal component loadings of the log-transformed measurements on the first four PC axes for *C. sp. 'virginalis kajose'* ( $n = 141$ ).

|          | PC1        | PC2         | PC3          | PC4         |
|----------|------------|-------------|--------------|-------------|
| Log(LaD) | -0.2302024 | 0.12016915  | 0.096548904  | -0.17450797 |
| Log(SnL) | -0.2300411 | 0.20254169  | -0.066832483 | -0.19911609 |
| Log(LJL) | -0.2290687 | 0.20598253  | 0.139249991  | 0.14622197  |
| Log(PPL) | -0.2291566 | 0.28220615  | 0.037525834  | -0.09746530 |
| Log(ChD) | -0.2267064 | 0.06364214  | 0.373783326  | -0.63314485 |
| Log(ED)  | -0.2266147 | 0.34167170  | 0.161813630  | 0.54953430  |
| Log(IOW) | -0.2301725 | 0.07882641  | -0.071785131 | -0.12040491 |
| Log(HW)  | -0.2311721 | 0.06417835  | -0.087312226 | 0.08087786  |
| Log(HL)  | -0.2312076 | 0.20180720  | -0.002540059 | 0.08062714  |
| Log(SL)  | -0.2315436 | -0.14763504 | -0.181017124 | 0.02285844  |
| Log(BD)  | -0.2284926 | -0.32251095 | 0.301970499  | 0.04231154  |
| Log(DFB) | -0.2303800 | -0.25617242 | -0.121195510 | 0.01224729  |
| Log(AFB) | -0.2268822 | -0.41703351 | 0.174904425  | 0.36140367  |
| Log(PRD) | -0.2307350 | 0.13224063  | -0.157999251 | -0.02015386 |
| Log(PRP) | -0.2311544 | 0.16311979  | -0.078957730 | 0.11711194  |
| Lo(PRV)  | -0.2314903 | 0.02415112  | 0.018192890  | 0.05529786  |
| Log(PRA) | -0.2312038 | -0.10383092 | -0.115517352 | -0.06284356 |
| Log(CPL) | -0.2253084 | -0.21593062 | -0.700897759 | -0.10791844 |
| Log(CPD) | -0.2272141 | -0.42799783 | 0.285250918  | -0.05262532 |

Supplementary Table 2: Principal component loadings of the log-transformed measurements on the first four PC axes for *C. chrysonotus* ( $n = 92$ ).

|          | PC1       | PC2          | PC3         | PC4          |
|----------|-----------|--------------|-------------|--------------|
| Log(LaD) | 0.2284629 | -0.223523419 | 0.38760587  | -0.188502246 |
| Log(SnL) | 0.2299019 | -0.110292186 | 0.28408723  | -0.014633174 |
| Log(LJL) | 0.2295109 | -0.324555640 | 0.07443489  | 0.022965718  |
| Log(PPL) | 0.2265218 | 0.081600058  | 0.58780654  | 0.386553253  |
| Log(ChD) | 0.2269611 | -0.178985960 | 0.06797976  | -0.200594782 |
| Log(ED)  | 0.2244508 | -0.537852065 | -0.52909652 | 0.161725881  |
| Log(IOW) | 0.2290103 | -0.026439782 | 0.06226288  | -0.355974288 |
| Log(HW)  | 0.2311496 | -0.004448746 | -0.01712732 | -0.152567664 |
| Log(HL)  | 0.2314761 | -0.163988444 | 0.07984747  | -0.022379591 |
| Log(SL)  | 0.2314680 | 0.181058070  | -0.11931051 | 0.140916340  |
| Log(BD)  | 0.2296302 | 0.308522486  | -0.07590342 | -0.188757924 |
| Log(DFB) | 0.2306261 | 0.276843337  | -0.09611951 | 0.078950739  |
| Log(AFB) | 0.2286696 | 0.377692185  | -0.13343964 | 0.095783958  |
| Log(PRD) | 0.2311620 | -0.017277630 | -0.05933872 | 0.008841111  |
| Log(PRP) | 0.2315437 | -0.117290865 | -0.06586320 | -0.045110257 |
| Log(PRV) | 0.2314092 | -0.019239596 | -0.11220296 | -0.097508256 |
| Log(PRA) | 0.2308278 | 0.161627262  | -0.22109620 | -0.034865898 |
| Log(CPL) | 0.2264398 | 0.025966302  | -0.06276945 | 0.671343672  |
| Log(CPD) | 0.2295107 | 0.297423748  | -0.05074983 | -0.250956770 |
